# Supplementary material for: Gastric Inhibitory Polypeptide Receptor (GIPR) Overexpression Reduces the Tumorigenic Potential of Retinoblastoma Cells
Source: MDPI journal article supplement (doi:10.3390/cancers16091656), 2024-04-25
Supplement: s1 [file s1]

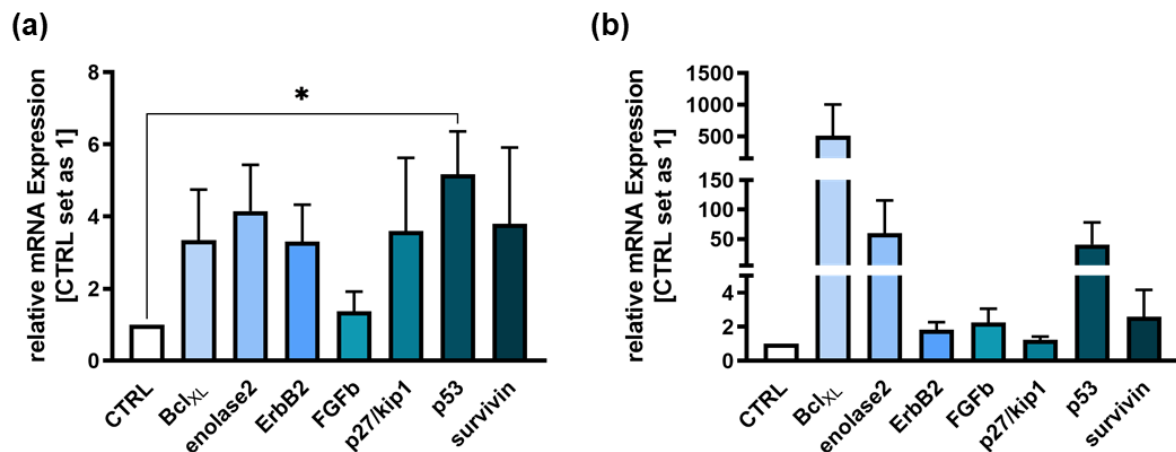

**Figure S1.** Verification of human oncology array data via Real-Time PCR. Potential GIPR pathway downstream signaling molecules found to be upregulated on protein level upon GIPR overexpression were likewise upregulated on mRNA level in WERI (a) and Y79 RB cells (b). white bar: CTRL= cells transduced with control vector. Colored bars: GIPR overexpressing cells. Values represent means  $\pm$  SEM; not significant p-values are not shown. \*p<0.05

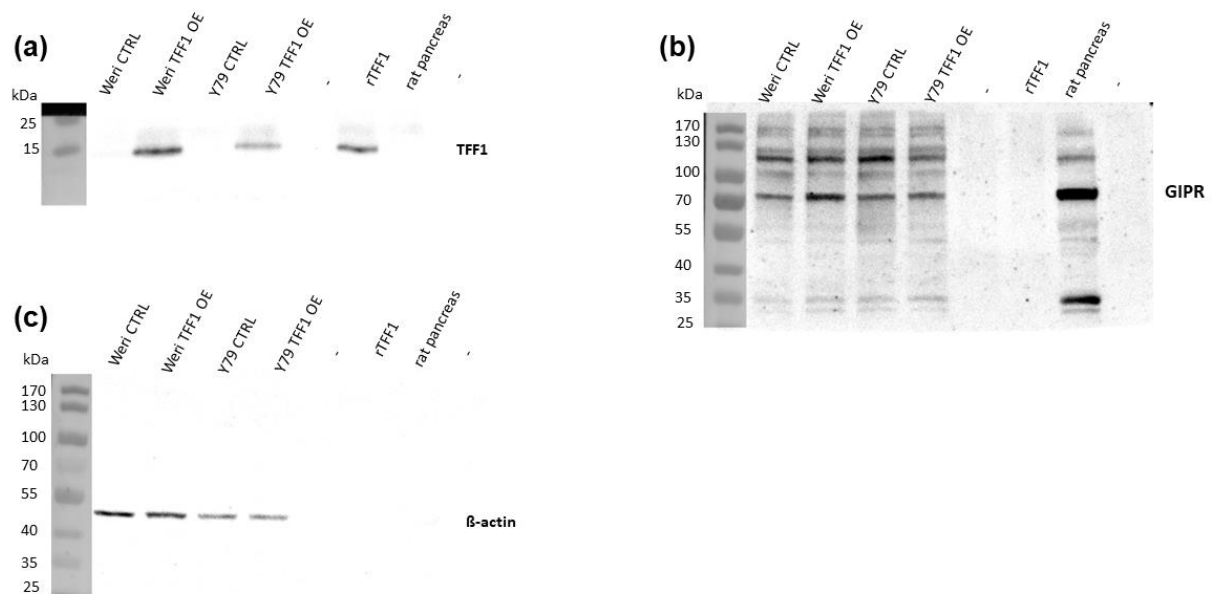

**Figure S2.** Uncropped Western blots shown in Figure 2c. Uncropped TFF1 (a), GIPR (b) and  $\beta$ -actin (c) Western blots with molecular weight markers (left lanes in KDa) of Weri and Y79 RB cells after lentiviral TFF1 overexpression. Rat pancreas served as a positive control. CTRL= cells transduced with control vector; kDa= kilodalton; rTFF1= recombinant TFF1

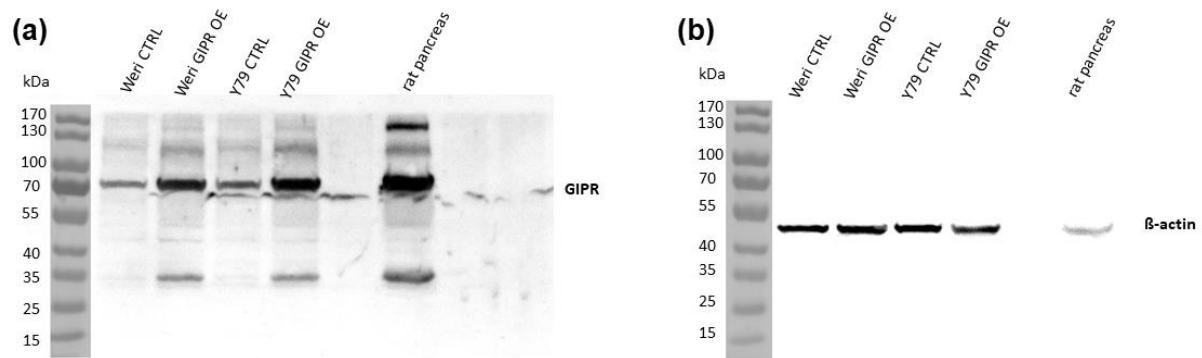

**Figure S3.** Uncropped Western blots shown in Figure 4b. Uncropped GIPR (a) and β-actin (b) Western blots with molecular weight markers (left lanes in kDa) of Weri and Y79 RB cells after lentiviral GIPR overexpression. Rat pancreas served as a positive control. CTRL= cells transduced with control vector; kDa= kilodalton

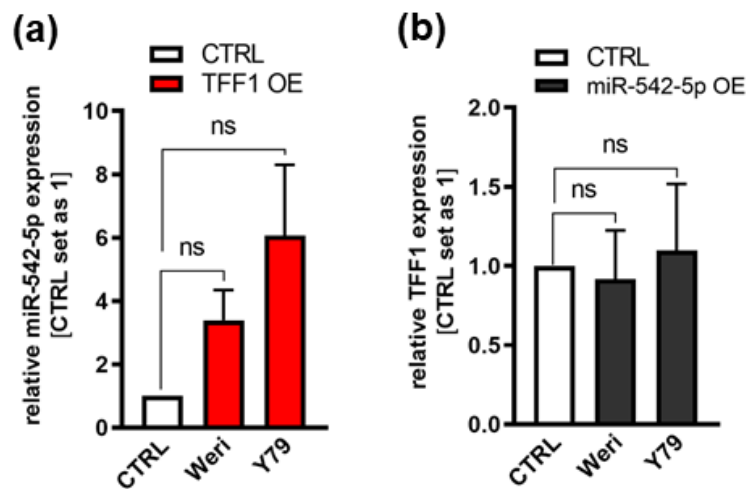

**Figure S4. Hypothetical TFF1-miR-542-5p or miR-542-5p-TFF1 signaling axis.** (a) Effect of TFF1 overexpression (TFF1 OE) on miR-542-5p expression levels as revealed by Real-Time PCR. (b) Effect of miR-542-5p overexpression (miR-542-5p OE) on TFF1 expression levels as revealed by Real-Time PCR. Values represent means ± SEM; ns= not significant compared to not overexpressing control (CTRL) cells.

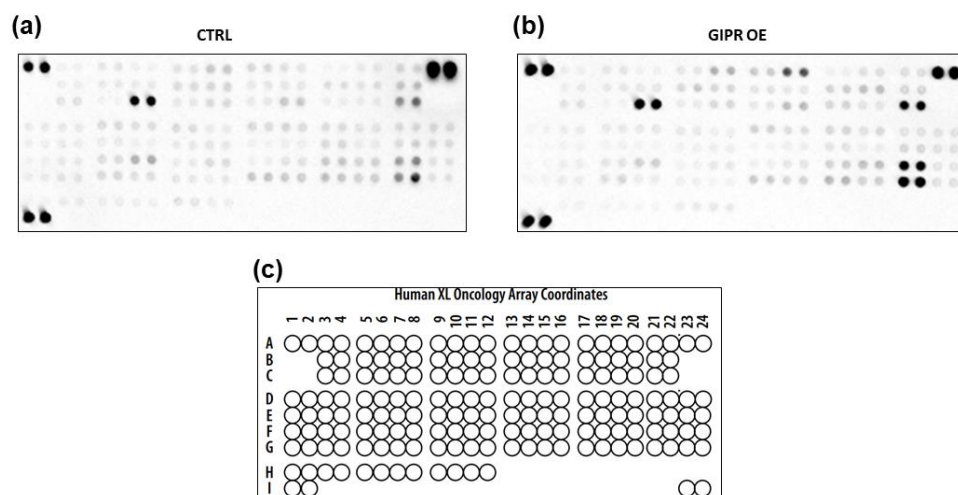

**Figure S5.** Uncropped human oncology array shown in Figure 10. Uncropped human oncology array of control cells (CTRL; **a**) and after GIPR overexpression (GIPR OE, **b**) in Weri Rb cells. The individual spots can be aligned according to a template (**c**) and the manufacturer's data sheet at [https://resources.rndsystems.com/pdfs/datasheets/ary026.pdf?v=20240424&\\_ga=2.25752637.1453456629.1714036456-411853202.1714036456](https://resources.rndsystems.com/pdfs/datasheets/ary026.pdf?v=20240424&_ga=2.25752637.1453456629.1714036456-411853202.1714036456)

**Table S1.** Significantly enriched GO-terms of genes differentially expressed after GIPR overexpression in Weri RB cells. count: gene numbers enriched in a specific GO-term.

| GO-term                                                   | count | p-value   |
|-----------------------------------------------------------|-------|-----------|
| GO:0043066~negative regulation of apoptotic process       | 5     | 0.0000084 |
| GO:0008284~positive regulation of cell proliferation      | 5     | 0.0000087 |
| GO:0001934~positive regulation of protein phosphorylation | 4     | 0.00003   |
| GO:0051726~regulation of cell cycle                       | 4     | 0.00005   |
| GO:0042981~regulation of apoptotic process                | 3     | 0.0023    |
| GO:0009410~response to xenobiotic stimulus                | 3     | 0.0029    |
| GO:0008285~negative regulation of cell proliferation      | 3     | 0.0079    |
| GO:0010628~positive regulation of gene expression         | 3     | 0.0099    |
| GO:0045892~negative regulation of transcription           | 3     | 0.0127    |
| GO:0006915~apoptotic process                              | 3     | 0.0139    |

**Table S2.** Significantly enriched KEGG-pathways of genes differentially expressed after GIPR overexpression in Weri RB cells. count: gene numbers enriched in a specific GO-term.

| KEGG-pathway                                       | count | p-value   |
|----------------------------------------------------|-------|-----------|
| hsa05200:pathways in cancer                        | 6     | 0.0000005 |
| platinum drug resistance                           | 4     | 0.000011  |
| hsa04151:PI3K-Akt signaling pathway                | 5     | 0.000041  |
| hsa05226:gastric cancer                            | 4     | 0.000096  |
| hsa05212:pancreatic cancer                         | 3     | 0.0012    |
| hsa05220:chronic myeloid leukemia                  | 3     | 0.0012    |
| hsa01521:EGFR tyrosine kinase inhibitor resistance | 3     | 0.0012    |
| hsa05222:small cell lung cancer                    | 3     | 0.0016    |
| hsa05215:prostate cancer                           | 3     | 0.0018    |
| hsa01522:endocrine resistance                      | 3     | 0.0018    |
| hsa04066:HIF-1 signaling pathway                   | 3     | 0.0022    |
| hsa04210:apoptosis                                 | 3     | 0.0035    |
| hsa05162:measles                                   | 3     | 0.0036    |
| hsa05224:breast cancer                             | 3     | 0.0041    |
| hsa05202:transcriptional misregulation in cancer 3 | 3     | 0.0070    |
| hsa05205:proteoglycans in cancer                   | 3     | 0.0078    |
| hsa04010:MAPK signaling pathway                    | 3     | 0.0165    |
| hsa05206:microRNAs in cancer                       | 3     | 0.0174    |
